1           **THE EFFECT OF DIOXIN ON LOW BIRTH WEIGHT IN SOUTHERN WEST**  
2                                                           **VIRGINIA BETWEEN 1955 – 1969**

3  
4   **Frank H Annie, PhD<sup>1</sup>, Chris K Uejio, PhD<sup>2</sup>, Sarah Embrey ,PharmD<sup>3</sup>, Alfred Tager MD<sup>1</sup>**

5  
6   <sup>1</sup>**Charleston Area Medical Center Health Education and Research Institute**  
7   **3200 MacCorkle Ave Charleston, WV 25304**

8  
9   <sup>2</sup>**The Florida State University ,Department of Geography**  
10 **Bellamy Building, Room 323 113 Collegiate Loop PO Box 3062190**  
11 **Tallahassee, FL 32306-2190**

12  
13 <sup>3</sup>**University of Charleston ,School of Phramcy 2300 MacCorkle Ave SE**  
14 **Charleston, WV 25304**

15  
16 <sup>1</sup>**For Correspondence**  
17 **Frank H Annie, PhD, MPA, MA**  
18 **Research Scietntist**  
19 **Charleston Area Medical Center Health Education and Research Institute**  
20 **3200 MacCorkle Ave Charleston, WV 25304**

21  
22 **Phone: 304-388-9921**  
23 **Fax: 304-388-9929**  
24 **Email: Frank.h.annie@camc.org**  
25

26 **Running Title: THE EFFECT OF DIOXIN ON LOW BIRTH WEIGHT IN SOUTHERN**  
27 **WEST VIRGINIA BETWEEN 1955 – 1969**  
28

29 **Original Research**

30  
31 **Authors have no competing interests to declare**  
32  
33  
34  
35

36 **ABSTRACT**

37 **Objective:**

38 The effect of low birth weight as a result of dioxin-based exposure has been investigated through  
39 the existing literature, but the debate on exact point source and production is still debated. The  
40 Monsanto factory located in Nitro, West Virginia produced Agent Orange from 1948 – 1969.

41 **Methods:**

42 The vital statistics registry from the state of West Virginia of Kanawha county and Putnam  
43 county West Virginia. The production of dioxin and 2-4-5T was obtained from the legal files  
44 from (Civil Action No. 04-C-465) and the expert witness of Dr. Bruce Bell. In order to  
45 understand this relationship a time series analysis was conducted to compare 2-4-5T and dioxin  
46 and low-birthweight in Kanawha County and Putnam County, West Virginia.

47 **Results:**

48 The results suggest dioxin within Kanawha county had a suggestive relationship associated with  
49 dioxin production and low birthweight from 1948- 1969 had a suggestive relationship of ( $p =$   
50 0.042). The comparison county of Putnam had no statistically significant relationship between  
51 low birthweight and dioxin production ( $p = 0.203$ ). Agent Orange (2-4-5t) was also considered  
52 and measured within the counties of Kanawha and Putnam Counties, within these two counties  
53 no statistically significant relationship was observed.

54 **Conclusions:**

55 In conclusion the association between dioxin and low birthweight still requires more research but  
56 this analysis illustrates that there appears to be a suggestive relationship that exists within  
57 Kanawha County, West Virginia as related to the production of and effect of the by-product of  
58 dioxin.

59 **Introduction**

60 Preterm birth (i.e., fewer than 37 weeks of gestation) and slower prenatal development produce  
61 low-birth-weight infants (1). Newborns weighing 2,500 grams or less are generally classified as  
62 low-birth-weight infants and may have slower growth rates, slower cognitive development, and  
63 reduced levels of maternal antibodies to fight infections (2,3,4). Low birth weight may also  
64 contribute to long-term complications, including chronic heart disease, chronic kidney disease,  
65 and a higher risk of developing diabetes later in life (3). An increasing number of low-birth-  
66 weight newborns correspondingly increases health care costs for households and health care  
67 networks (5,6).

68 The causes of low birth weight have been determined to be multifactorial and include  
69 exposures such as maternal alcohol use, smoking, infection during pregnancy, drug abuse,  
70 maternal age less than 17 years or greater than 35 years, and race (7,8, 9,10). The mother's health  
71 status can also play a significant role in the development process, as any related illnesses can  
72 alter the development process of the fetus (11). Other external variables that have been examined  
73 include toxic chemical exposures such as dioxins, lead, mercury, and PCBs (11).

74 Current literature indicates a possible link between low birth weight in newborns and  
75 dioxin exposure (12, 13, 14). Dioxins are a class of chemical by-products generated in various  
76 manufacturing processes, such as the production of rubbers and synthetic plastics. At the  
77 Monsanto plant in Nitro, West Virginia, which is the focus of this study, dioxins were generated  
78 during the production of sodium 2,4,5-Trichlorophenate (NaTCP) (15,16). The estimated amount  
79 of dioxin produced from 1948 to 1969 was approximately 0.47 parts per million (17). Depending  
80 on the subclass, dioxin exposures below 0. 1–1.0 parts per trillion may not cause adverse health  
81 effects (18).

82           The primary avenue of human exposure is through consuming contaminated foods (19);  
83   however, in populations with consistent dioxin exposure, dermal absorption may also be an  
84   important exposure route. The pathophysiology of how the body processes dioxin differs from  
85   person to person, but the substance is metabolized and broken down within the liver and  
86   absorbed into fatty cells. The rate of breakdown depends on the subclass of dioxin and the  
87   amount of fat within the body (20). Dioxin's chemical structure is similar to some hormones and  
88   may bind to cellular aryl hydrocarbon receptors and immediately affect human health (19).  
89   Dioxin can remain in the tissue for many years depending on fat content (20). Exposure at  
90   sufficient levels may cause health problems such as cancer, male reproduction toxicity, female  
91   reproduction toxicity, effects on unborn fetuses, skin disorders, and other metabolic and  
92   hormonal abnormalities (19,21). This study builds upon previous work where areas that  
93   produced or have high dioxin concentrations also report elevated rates of low birth weight  
94   compared to neighboring counties (22, 6). Some studies suggested that excessive exposure over a  
95   short period may also negatively impact birth outcomes (23).

96           This study focuses on a point dioxin exposure source in a United States community with  
97   a lower dioxin production (of approximately 0.47 parts per million) than Vietnam. During the  
98   Vietnam War, larger dioxin exposures caused adverse health outcomes these exposure quantities  
99   could range from 0.001 to 1.0 parts per million depending on the level of contamination in the  
100   region (19). This study investigates the relationship between Kanawha County's and neighboring  
101   Putnam County's low birth weight rates and the Monsanto plant dioxin production from 1955 to  
102   1969. Other dioxin studies focus primarily on indirect dioxin and PCB exposures from  
103   consuming food (e.g., fish) and low newborn birth weight (24). This study also examines the  
104   synchronous relationship between dioxin production and low birth weight whereas other studies

105 examine the lingering health effects of existing dioxin contamination. Furthermore, this study  
106 separately compares dioxin production against the proportion of low-birth-weight children while  
107 controlling for independent risk factors such as median household income.

108

## 109 **Methods**

### 110 *Study Area*

111 The study area includes the residents of Kanawha County and Putnam County, West Virginia.  
112 Kanawha County consists of Nitro, Charleston (the state capitol), and over 100 towns and small  
113 cities located near the Monsanto plant (see Figure 1). From 1948 to 1969, the U.S. government  
114 commissioned chemical companies such as Monsanto to produce Agent Orange in Nitro, West  
115 Virginia. By 1969, the U.S. government had discontinued using the substance for any large-scale  
116 military operations in Vietnam, and Monsanto subsequently halted Agent Orange production at  
117 its Nitro plant. To provide a comparison, the study tests whether Kanawha County dioxin  
118 production is related to low birth weight in Putnam County. This county was compared because  
119 of its geographical proximity to Kanawha County as well as the low birthweight data was also  
120 available from Putnam County as well. No additional point sources of pollution were in the  
121 Putnam County area (see Figure 1).

122

123

### 124 *Data*

125 This study's primary data sources include birth records from the State of West Virginia Vital  
126 Statistics Registry and a court document from the Putnam County Court of West Virginia, the  
127 former of which provided the annual total number of births and low-birth-weight infants along

128 with the proportion of low-birth-weight infants in the study counties. The study involved subjects  
129 born between 1955 and 1969 who were issued a new birth certificate in Kanawha or Putnam  
130 County. The Vital Statistics Registry did not compile a database of birth records before 1955.  
131 Moreover, due to a structure fire, additional documents from 1970 to 1985 were destroyed or  
132 damaged and could not be obtained as they no longer existed. The registry did not include those  
133 who resided in the county but those who went to a medical facility outside the county to give  
134 birth.

135 The second data source is the Putnam County Court document against the Agricultural  
136 Division of Monsanto. From 1948 through 1969, this report estimated dioxin production loss to  
137 the environment through burning, sewer loss, production, and waste disposal, which was  
138 estimated to be 10,000 pounds. Dr. Bruce Bell, an expert witness for the plaintiff, reported the  
139 estimates during the court case discovery period for the plaintiff (Civil Action No. 04-C-465).  
140 Dr. Bell's estimates were generated from the Monsanto plant blueprints and sales receipts. The  
141 Calwell Practice PLLC, Law and Arts Center West in Charleston, West Virginia, commissioned  
142 the report.

143 This study also considered statewide annual median household income provided by the  
144 United States Census Bureau. Median household income was adjusted and standardized for  
145 inflation from 1955 to 1969. Income may be a surrogate marker for access to health care, health  
146 literacy, smoking, and alcohol usage, all of which may influence low birth weight (25). In fact,  
147 the correlation between household income and low birth weight has been established within the  
148 literature (26). The study could not control for annual rates of smoking and alcohol usage, as  
149 these were unavailable for the study period and region.

150

151 **Statistical Analysis**

152 For each county, we created separate multiple variable time series models to relate dioxin  
153 production to low birth weight while controlling for median household income. Epidemiology  
154 commonly uses time series analysis to describe a short-term exposure to a health outcome (27).  
155 The technique compares rates in the same study population over time, which naturally controls  
156 for slowly changing low birth weight confounders.

157

158 **Equation 1:  $Low\ birth\ weight\ (\%)_t = B_1 (Dioxin\ Production)_{t-1} + B_2 (Median\ Household$**   
159  **$Income)_t + B_3(year)_t + e (0, \sigma^2)$**

160

161 In Equation 3, low birth weight is the percentage of low-birth-weight infants, and the  
162 exposure variable is dioxin production. The equation also controls for median household income  
163 and long-term temporal trends (study year). To further account for the gestational lag between  
164 exposure and birth, each exposure variable was lagged one year. For example, exposure in 1955  
165 would influence birth weight in 1956; the subscript  $t$  thus refers to the year sequence beginning  
166 at 1956, or 1955 for  $t-1$ . The time series model assumptions were then verified with standard  
167 diagnostic tests. A histogram confirmed that the residuals were normally distributed.  
168 Furthermore, autocorrelation and partial autocorrelation functions verified that the time series did  
169 not contain significant residual temporal autocorrelation. Finally, Akaike and Bayesian  
170 Information Criterion measured the time series model fit.

171

172 **Results**

173

174 **Table 1. Results of the time series analysis on dioxin production and low birth weight in**  
175 **Kanawha County, West Virginia.**

176

177

| <b>Variable</b>          | <b>Coefficient</b> | <b>Standard Error</b> | <b>T</b>     | <b>P &gt; t</b> | <b>(95%) Confidence Interval</b> |
|--------------------------|--------------------|-----------------------|--------------|-----------------|----------------------------------|
| <b>Dioxin Production</b> | <b>0.0411</b>      | <b>0.0178</b>         | <b>2.31</b>  | <b>0.042</b>    | <b>0.0018–0.0804</b>             |
| <b>Median Income</b>     | <b>–4.528</b>      | <b>1.1938</b>         | <b>–3.48</b> | <b>0.005</b>    | <b>–6.7805––1.5251</b>           |
| <b>Year</b>              | <b>0.2457</b>      | <b>0.122</b>          | <b>2.19</b>  | <b>0.051</b>    | <b>–0.0012–0.4928</b>            |

178

179 **Table 2. Results of the time series analysis on dioxin production and low birth weight in**  
180 **Putnam County, West Virginia.**

| <b>Variable</b>          | <b>Coefficient</b> | <b>Standard Error</b> | <b>T</b>     | <b>P &gt; t</b> | <b>(95%) Confidence Interval</b> |
|--------------------------|--------------------|-----------------------|--------------|-----------------|----------------------------------|
| <b>Dioxin Production</b> | <b>0.0053</b>      | <b>0.0039</b>         | <b>1.35</b>  | <b>0.203</b>    | <b>–0.0033–0.0140</b>            |
| <b>Median Income</b>     | <b>–0.0001</b>     | <b>0.0003</b>         | <b>–0.83</b> | <b>0.424</b>    | <b>–0.0001–0.0004</b>            |
| <b>Year</b>              | <b>0.1827</b>      | <b>0.2767</b>         | <b>0.66</b>  | <b>0.522</b>    | <b>–0.4203–0.7857</b>            |

181

182

183 Tables 1 and 2 report the regression results from the best fitting time series models. Both  
184 models fulfilled the time series model assumptions. The Kanawha County regression model  
185 tested the association between annual dioxin production and the percentage of low-birth-weight



186 infants (see Table 1). Based on the beta coefficient, every 10 pounds of dioxin produced an  
187 increased incidence of low birth weight by 0.41%. Moreover, each \$10,000 USD increase in  
188 household income decreased the incidence of low birth weight by 4.5% ( $p = 0.005$ ). Figure 2  
189 plots the relationship between observed and time series–fitted low birth weight for dioxin  
190 production.

191 Table 1 reports the regression results of the best fitting time series model of Putnam  
192 County. Dissimilar to Kanawha County’s regression table, this one indicates no significant  
193 results associated with the acute exposure of dioxin and low birth weight. Figure 3 plots the  
194 relationship in the county between the observed acute dioxin exposure and the time series–fitted  
195 low birth weight time series analysis.

196

## 197 **Discussion**

198 This study found a suggestive relationship between an increase of dioxin from the production of  
199 Agent Orange (2,4,5-T) (see Appendix) and an acute increase of low birth weight in Kanawha  
200 County, West Virginia ( $P = 0.042$ ). Individuals with lower socioeconomic status consistently  
201 tend to have infants with lower birth weights (25,28, 29, 30, 31,). A comparison county, Putnam  
202 County, located west of Kanawha County, was analyzed during the same period. Results found  
203 that there was no association between low birth weight and the production of dioxins ( $P = 0.203$ )  
204 in Putnam County. This outcome provides additional evidence that Kanawha County dioxin  
205 exposure is not a proxy for an unmeasured time-varying exposure.

206 Our study results suggest that dioxin production may increase the incidence of low birth  
207 weight over time. Again, this study builds upon previous work where areas that produced or have  
208 high dioxin concentrations also report elevated rates of low birth weight compared to

209 neighboring counties (32,33). These previous two studies examined exposure related to the  
210 consumption of food or working in dioxin-related industries. For instance, the Rylander 1995  
211 study assessed the high use of contaminated food from the (Sweden) Baltic Sea that was  
212 associated with an increased risk of low birth weight in the community; the Rylander 2000 study  
213 further supported the link between the intake of dioxin from fish and an increased risk of low  
214 birth weight. However, neither study estimated a range of dioxin exposure levels that  
215 corresponded to the risk of low birth weight infants. Further studies such as the Tsikimori 1968–  
216 2004 work explored the link between exposure to rice contaminated with Yusho oil and preterm  
217 births and induced abortions in Japan, researching the period from 1968 to 2004, when dioxin  
218 exposure had ceased. The study found that women exposed to dioxins had a twofold increase in  
219 preterm pregnancy and an increase in induced abortions five times greater than the baseline  
220 number.

221 In the study area and period, dioxin exposures were estimated at 0.47 parts per million  
222 (Civil Action No. 04-C-465). This level of exposure is generally similar to that found in  
223 international studies of dioxin exposure and adverse newborn outcomes. Karmaus's 1995 study,  
224 conducted in Germany, more precisely measured dioxin exposures and low birth weight:  
225 newborns with median concentrations of dioxin in blood samples of 0.5 parts per million  
226 demonstrated an average decrease of 175 grams and 2 centimeters from their birth measurements  
227 compared to nonexposed infants. Relatedly, studies suggest acute dioxin exposures of  
228 approximately 0.3 parts per million increase the risk of urinary tract birth defects in France (32).

229 Our studies are partially consistent with studies on laboratory animals, specifically rat  
230 studies illustrating reduced size of offspring (34,35). Dioxin binds to the fetus's cellular aryl  
231 hydrocarbon receptor (AhR), which activates a gene that influences growth hormones. Dioxins

232 can act at the AhR due to their structural similarity to other endogenous hormones in the human  
233 body. This occurrence in turn causes random growth variations that lead to the reduced  
234 formation and growth of an infant (36). Research on AhR receptors confirms a correlation  
235 between dioxin-linked gene modification and chronic effects such as a compromised immune  
236 system and soft tissue damage (37).

237         The primary mechanism of dioxin exposure is consuming food contaminated with fine  
238 dioxin and other chemical powders that circulate in the area. The dioxin was released into the  
239 water and air of the surrounding community through waste disposal and incineration practices  
240 (38, 39). The fine dioxin powder adheres to clothing and can accumulate inside buildings and  
241 cause adverse health outcomes over time or have a more immediate effect (40, 41).

242         This section describes the limitations of the population-based study, which used existing  
243 secondary data sources to investigate the relationship between dioxin production and low birth  
244 weight. The study also used a time series analysis to account for as many limitations as possible.  
245 These models control for other low birth weight risk factors that change slowly over time;  
246 however, the study design cannot control for the effects of other chemicals in the study area with  
247 similar production schedules to dioxins. For example, the DuPont factory in Dunbar, West  
248 Virginia, was five miles upstream from the Monsanto site, and data regarding the production of  
249 substances at this plant could not be obtained for this study.

250         Other noteworthy issues concern births that occurred at institutions outside Kanawha  
251 County and the time when birth certificates were issued. For instance, it should be noted that the  
252 study period covers the time before the interstate highway system was constructed. It therefore  
253 may have been difficult to reach the next closest hospital outside the patient's home county, and  
254 for this reason, relatively few patients would have been misclassified into the incorrect county. A

255 time lag may have also occurred between home birth and birth registration, as only children born  
256 in a hospital would have been issued a birth certificate immediately. Conducting the time series  
257 analysis at yearly intervals would minimize—but not eliminate—birth timing misclassification  
258 error.

259 Our study relied on testimony from a single source to estimate chemical production and  
260 used median household income as a surrogate for health status and behaviors such as alcohol and  
261 tobacco usage. Controlling for these risk factors would strengthen the study results, but historical  
262 local alcohol and tobacco use rates were not systematically collected. We examined national  
263 alcohol and tobacco use trends over time to test whether they exhibit a similar pattern to dioxin  
264 production. Smoking prevalence was increasing during the mid-1950s, before the study period;  
265 during the study period, it remained relatively constant until the mid-1970s, with a gradual  
266 downward trend when bans on smoking commercials were introduced and smoking cessation  
267 began to be promoted (42). A National Institute of Alcohol Abuse and Alcoholism study  
268 illustrates that alcohol consumption increased across the study period (42). Increased alcohol  
269 consumption could lead to increased low birth weight depending on levels of consumption (43).  
270 If regional statistics mirrored national alcohol and tobacco consumption trends, these risk factors  
271 did not mimic the dioxin production schedules.

272

## 273 **Conclusion**

274 This study illustrates that a higher exposure level of 0.47 parts per million can influence low  
275 birth weight within the surrounding area. Furthermore, the findings of this study reveal a  
276 suggestive relationship ( $p = 0.042$ ) as compared to low birth weight within Kanawha County,  
277 West Virginia. A comparison county, Putnam County, was included to provide further evidence

278 of an association between dioxin exposure and low birth weight, but this test provided no  
279 statistical significance ( $P = 0.203$ ). Dioxins and dioxin-like substances are prevalent within our  
280 environment even now, and the findings of this study suggest that there might be an effect.  
281 Further research is needed to understand the continued effect within the environment,  
282 specifically in the Appalachian Region. Based on existing literature, dioxin is still within the  
283 environment of Kanawha County, West Virginia; at high levels and with a multidecade half-life,  
284 it will remain in the environment for years to come.

285

286

## Appendix

287

288 **Table A1. Results of the time series analysis of 2,4,5-T production and low birth weight.**

289

290

| Variable                  | Coefficient    | Standard Error | T            | P > t        | (95%) Confidence Interval |
|---------------------------|----------------|----------------|--------------|--------------|---------------------------|
| <b>2,4,5-T Production</b> | <b>0.0019</b>  | <b>0.0009</b>  | <b>1.95</b>  | <b>0.077</b> | <b>-0.0002–0.0041</b>     |
| <b>Median Income</b>      | <b>-4.0929</b> | <b>1.2525</b>  | <b>-3.27</b> | <b>0.007</b> | <b>-6.8497–-1.3362</b>    |
| <b>Year</b>               | <b>0.2492</b>  | <b>0.1178</b>  | <b>2.12</b>  | <b>0.058</b> | <b>-0.0100–0.5086</b>     |

291

292

There is a positive but marginally significant relationship between low birth weight and

293

2,4,5-T production ( $p = 0.077$ ) (see Table A1): Based on the beta coefficient, every 10,000

294

pounds of 2,4,5-T produced increased the incidence of low birth weight by 0.19%. Similar to the

295

dioxin model, higher median household income significantly decreased the proportion of low-

296

birth-weight children ( $p = 0.007$ ). For every \$10,000 increase in median household income, low

297

birth weight incidence decreased by 4.0%. Figure A1 plots the relationship between observed

298

and time series-fitted low birth weight for 2,4,5-T production. The model demonstrates a

299

supportive relationship, but certain years (e.g., 1968 and 1969) do not exhibit a strong

300

relationship between production and low birth weight.

301

302

303

304

305

306

307

308

309

310

311

312

313

314

315

References

316

- 317 1. Kim, Hye Eun, et al. "Trends in Birth Weight and the Incidence of Low Birth Weight and  
318 Advanced Maternal Age in Korea between 1993 and 2016." *Journal of Korean Medical*  
319 *Science*, vol. 34, no. 4, Jan. 2019, p. e34, doi:10.3346/jkms.2019.34.e34.
- 320 2. Aarnoudse-Moens, C. S. H., et al. "Meta-Analysis of Neurobehavioral Outcomes in Very Preterm  
321 and/or Very Low Birth Weight Children." *Pediatrics*, vol. 124, no. 2, Aug. 2009, pp. 717–28,  
322 doi:10.1542/peds.2008-2816.
- 323 3. Hack, M., et al. "Long-Term Developmental Outcomes of Low Birth Weight Infants." *The Future*  
324 *of Children / Center for the Future of Children, the David and Lucile Packard Foundation*, vol. 5,  
325 no. 1, 1995, pp. 176–96, doi:10.2307/1602514.
- 326 4. Larroque, B. "Developmental Sequelae of Very Premature Children at School Age. [French]."  
327 *Journal de Gynecologie Obstetrique et Biologie de La Reproduction*, vol. 33, no. 6 I, Oct. 2004, pp.  
328 475–86,  
329 <http://ovidsp.ovid.com/ovidweb.cgi?T=JS&CSC=Y&NEWS=N&PAGE=fulltext&D=emed6&AN=2004443791%5Cnhttp://202.120.227.56:3210/sfxlcl3?sid=OVID:embase&id=pmid:&id=doi:&issn=0368-2315&isbn=&volume=33&issue=6+I&spage=475&pages=475-486&date=2004&title=Journal+de+Gyn.>  
330
- 331 5. Russell, R. B., et al. "Cost of Hospitalization for Preterm and Low Birth Weight Infants in the  
332 United States." *Pediatr*, vol. 120, doi:10.1542/peds.2006-2386.
- 333 6. Rylander, Lars, et al. "Decreased Birth Weight in Infants Born to Women with a High Dietary  
334 Intake of Fish Contaminated with Persistent Organochlorine Compounds." *Scandinavian Journal*  
335 *of Work, Environment & Health*, vol. 21, no. 5, 2011, pp. 368–75, doi:10.5271/sjweh.51.
- 336 7. Als, Heidelise. "Individualized Developmental Care for the Very Low-Birth-Weight Preterm  
337 Infant." *Jama*, vol. 272, no. 11, 2011, p. 853, doi:10.1001/jama.1994.03520110033025.
- 338 8. Clemans-Cope, Lisa, et al. "Pregnant Women with Opioid Use Disorder and Their Infants in Three  
339 State Medicaid Programs in 2013–2016." *Drug and Alcohol Dependence*, vol. 195, Feb. 2019, pp.  
340 156–63, doi:10.1016/j.drugalcdep.2018.12.005.
- 341 9. De Vita, Maria Vittoria, et al. "Malnutrition, Morbidity and Infection in the Informal Settlements  
342 of Nairobi, Kenya: An Epidemiological Study." *Italian Journal of Pediatrics*, vol. 45, no. 1, Jan.  
343 2019, p. 12, doi:10.1186/s13052-019-0607-0.
- 344 10. Ponticelli, Claudio, and Gabriella Moroni. "Fetal Toxicity of Immunosuppressive Drugs in  
345 Pregnancy." *Journal of Clinical Medicine*, vol. 7, no. 12, Dec. 2018, p. 552,  
346 doi:10.3390/jcm7120552.
- 347 11. Rahman, Mohammad L., et al. "Investigating Causal Relation between Prenatal Arsenic Exposure  
348 and Birthweight: Are Smaller Infants More Susceptible?" *Environment International*, vol. 108,  
349 2017, pp. 32–40, doi:10.1016/j.envint.2017.07.026.
- 350 12. Baba, T., et al. "Intrinsic Function of the Aryl Hydrocarbon (Dioxin) Receptor as a Key Factor in  
351 Female Reproduction." *Molecular and Cellular Biology*, vol. 25, no. 22, 2005, pp. 10040–51,  
352 doi:10.1128/mcb.25.22.10040-10051.2005.
- 353 13. Chen, Ichen, et al. "Indole-3-Carbinol and Diindolylmethane as Aryl Hydrocarbon (Ah) Receptor  
354 Agonists and Antagonists in T47D Human Breast Cancer Cells." *Biochemical Pharmacology*, vol.  
355 51, no. 8, 1996, pp. 1069–76, doi:10.1016/0006-2952(96)00060-3.
- 356 14. Detmar, Jacqui, et al. "Fetal Growth Restriction Triggered by Polycyclic Aromatic Hydrocarbons  
357 Is Associated with Altered Placental Vasculature and AhR -Dependent Changes in Cell Death ."  
358 *American Journal of Physiology-Endocrinology and Metabolism*, vol. 295, no. 2, 2008, pp. E519–  
359 30, doi:10.1152/ajpendo.90436.2008.
- 360
- 361

- 362 15. Udell, Jon G. "Can Attitude Measurement Predict Consumer Behavior?" *Journal of Marketing*,  
363 vol. 29, no. 4, 1965, pp. 46–50.
- 364 16. Strum, J. C. *Progress Report Nitro Plant Technical Services, Reduction of TDD in NaTCP - Building*  
365 *92*. 1969.
- 366 17. Zina Bibb, et al. v. Monsanto, et al., Civil Action No. 04-C-465, filed on December 17, 2004,  
367 against Monsanto Company and Pharmacia Corporation
- 368 18. USEPA Office Of Research Development. "Estimating Exposure to Dioxin-Like Compounds, Vol II  
369 Properties, Sources, Occurrence and Background Exposures." *Usepa*, 1994.
- 370 19. Lorber, Matthew, Donald Patterson, Janice Huwe, and Henry Kahn. "Evaluation of  
371 Background Exposures of Americans to Dioxin-like Compounds in the 1990s and the 2000s."  
372 *Chemosphere*, vol. 77, no. 5, 2009, pp. 640–51.
- 373 20. Pirkle, William H., and Thomas C. Pochapsky. "Considerations of Chiral Recognition Relevant to  
374 the Liquid Chromatography Separation of Enantiomers." *Chemical Reviews*, vol. 89, no. 2, 1989,  
375 pp. 347–62.
- 376 21. DeVito, M., and L. S. Birnbaum. "Toxicology of the Dioxins and Related Chemicals." *Dioxins*  
377 *and Health*, 1994.
- 378 22. Govarts, Eva, et al. "Birth Weight and Prenatal Exposure to Polychlorinated Biphenyls (PCBs) and  
379 Dichlorodiphenyldichloroethylene (DDE): A Meta-Analysis within 12 European Birth Cohorts."  
380 *Environmental Health Perspectives*, vol. 120, no. 2, 2012, pp. 162–70, doi:10.1289/ehp.1103767.
- 381 23. Ding, Tianbing, Melinda McConaha, Kelli L. Boyd, Kevin G. Osteen, and Kaylon L. Bruner-Tran.  
382 "Developmental Dioxin Exposure of Either Parent Is Associated with an Increased Risk of  
383 Preterm Birth in Adult Mice." *Reproductive Toxicology*, vol. 31, no. 3, 2011, pp. 351–58.
- 384 24. Giesy, J. P., et al. "Effects of Chronic Dietary Exposure to Environmentally Relevant  
385 Concentrations to 2,3,7,8-Tetrachlorodibenzo-p-Dioxin on Survival, Growth, Reproduction and  
386 Biochemical Responses of Female Rainbow Trout (*Oncorhynchus Mykiss*)." *Aquatic Toxicology*,  
387 vol. 59, 2000, pp. 35–53.
- 388 25. Villar, José, and JoséM. Belizán. "The Relative Contribution of Prematurity and Fetal Growth  
389 Retardation to Low Birth Weight in Developing and Developed Societies." *American Journal of*  
390 *Obstetrics and Gynecology*, vol. 143, no. 7, 2016, pp. 793–98, doi:10.1016/0002-9378(82)90012-  
391 6.
- 392 26. Garrett, B. E., Dube, S. R., Trosclair, A., Caraballo, R. S., Pechacek, T. F., et al. "Cigarette  
393 Smoking—United States, 1965–2008." *MMWR Surveill Summ*, vol. 60, no. 1, 2011, pp. 109–13.
- 394 27. Bhaskaran, Krishnan, Antonio Gasparrini, Shakoor Hajat, Liam Smeeth, and Ben Armstrong.  
395 "Time Series Regression Studies in Environmental Epidemiology." *International Journal of*  
396 *Epidemiology*, vol. 42, no. 4, 2013, pp. 1187–95.
- 397 28. Chu, J. R., Hagan, J., & Hair, A. *An Investigation into the Association Between Socioeconomic*  
398 *Factors with Growth and Developmental Outcomes in Premature Low Birth Weight Infants*.  
399 2018.
- 400 29. Foster, H. W., et al. "Intergenerational Effects of High Socioeconomic Status on Low Birthweight  
401 and Preterm Birth in African Americans." *Journal of the National Medical Association*, vol. 92,  
402 no. 5, 2000, pp. 213–21,  
403 <http://www.pubmedcentral.nih.gov/articlerender.fcgi?artid=2640563&tool=pmcentrez&render>  
404 [type=abstract](http://www.pubmedcentral.nih.gov/articlerender.fcgi?artid=2640563&tool=pmcentrez&render).
- 405 30. Krieger, N., et al. "Choosing Area Based Socioeconomic Measures to Monitor Social Inequalities  
406 in Low Birth Weight and Childhood Lead Poisoning: The Public Health Disparities Geocoding  
407 Project (US)." *Journal of Epidemiology and Community Health*, vol. 57, no. 3, 2003, pp. 186–99,  
408 doi:10.1136/jech.57.3.186.



- 409 31. Pattenden, S., et al. "Inequalities in Low Birth Weight: Parental Social Class, Area Deprivation,  
410 and 'lone Mother' Status." *Journal of Epidemiology and Community Health*, vol. 53, no. 6, 1999,  
411 pp. 355–58, doi:10.1136/jech.53.6.355.
- 412 32. Cordier, Sylvaine, et al. "Maternal Residence near Municipal Waste Incinerators and the Risk of  
413 Urinary Tract Birth Defects." *Occupational and Environmental Medicine*, vol. 67, no. 7, 2010, pp.  
414 493–99, doi:10.1136/oem.2009.052456.
- 415 33. Karmaus, W., and N. Wolf. "Reduced Birthweight and Length in the Offspring of Females  
416 Exposed to PCDFs, PCP, and Lindane." *Environmental Health Perspectives*, vol. 103, no. 12, 1995,  
417 pp. 1120–25, doi:10.1289/ehp.951031120.
- 418 34. Rier, S. E., Martin, D. C., Bowman, R. E., Dmowski, W. P., & Becker, J. L. (1993). Endometriosis  
419 in rhesus monkeys (*Macaca mulatta*) following chronic exposure to 2, 3, 7, 8-tetrachlorodibenzo-  
420 p-dioxin. *Fundamental and applied toxicology*, 21(4), 433-441.
- 421 35. Murray, Noreen E., Sandra A. Bruce, and K. Murray. "Molecular Cloning of the DNA Ligase Gene  
422 from Bacteriophage T4: II. Amplification and Preparation of the Gene Product." *Journal of*  
423 *Molecular Biology*, vol. 132, no. 3, 1979, pp. 493–505.
- 424 36. NEBERT, DANIEL W., et al. "Role of the Ah Receptor and the Dioxin-Inducible [Ah] Gene Battery  
425 in Toxicity, Cancer, and Signal Transduction." *Annals of the New York Academy of Sciences*, vol.  
426 685, no. 1, 1993, pp. 624–40, doi:10.1111/j.1749-6632.1993.tb35928.x.
- 427 37. Sinkkonen, Seija, and Jaakko Paasivirta. "Degradation Half-Life Times of PCDDs, PCDFs and PCBs  
428 for Environmental Fate Modeling." *Chemosphere*, vol. 40, no. 9–11, 2000, pp. 943–49,  
429 doi:10.1016/S0045-6535(99)00337-9.
- 430 38. Eljarrat, Ethel, et al. "Effects of Sewage Sludges Contaminated with Polychlorinated Dibenzo-p-  
431 Dioxins, Dibenzofurans, and Biphenyls on Agricultural Soils." *Environmental Science and*  
432 *Technology*, vol. 31, no. 10, 1997, pp. 2765–71, doi:10.1021/es9610601.
- 433 39. Manz, A., et al. "Cancer Mortality among Workers in Chemical Plant Contaminated with Dioxin."  
434 *The Lancet*, vol. 338, no. 8773, pp. 959–64, doi:10.1016/0140-6736(91)91835-l.
- 435 40. Brezner, Esther, Joseph Terkel, and Albert S. Perry. "The Effect of Aroclor 1254 (PCB) on the  
436 Physiology of Reproduction in the Female Rat--I. Comparative Biochemistry and Physiology. C."  
437 *Comparative Pharmacology and Toxicology*, vol. 77, no. 1, 1984, pp. 65–70.
- 438 41. Lucier, G. W., et al. "Ingestion of Soil Contaminated with 2,3,7,8-Tetrachlorodibenzo-p-Dioxin  
439 (TCDD) Alters Hepatic Enzyme Activities in Rats." *Toxicological Sciences*, vol. 6, no. 2, 1986, pp.  
440 364–71, doi:10.1093/toxsci/6.2.364.
- 441 42. Ramstedt, Mats. "Alcohol and Fatal Accidents in the United States-A Time Series Analysis for  
442 1950-2002." *Accident Analysis and Prevention*, vol. 40, no. 4, pp. 1273–81,  
443 doi:10.1016/j.aap.2008.01.008.
- 444 43. Mills, J. L., Graubard, B. I., Harley, E. E., Rhoads, G. G., & Berendes, H. W. (1984). Maternal  
445 alcohol consumption and birth weight: How much drinking during pregnancy is  
446 safe?. *Jama*, 252(14), 1875-1879.

447

448

449

450

451

452 Figure Legend

453

454 **1. Figure 1. Kanawha County, West Virginia, which includes the county seat of Charleston,**  
455 **West Virginia (the state capitol), had a census of 252,925 in 1960. The area is defined by a**  
456 **massive chemical industry as well as the coal industry. Kanawha County also includes**  
457 **large banks, hospitals, and universities. Putnam County, which includes the county seat of**  
458 **Winfield and the largest city of Hurricane, had a census of 23,561 in 1960. Putnam County**  
459 **included several towns and later became a suburban area between Kanawha County and**  
460 **Cabell County, West Virginia.**

461  
462 **2. Figure 2. Time series analysis on low birth weight compared to dioxin production in**  
463 **Kanawha County, West Virginia, from 1955 to 1969 ( $P = 0.042$ ).**

464  
465 **3. Figure 3. Time series analysis on low birth weight compared to dioxin production in**  
466 **Putnam County from 1955 to 1969 ( $P = 0.203$ ).**

467  
468 **1A. Time series analysis of low birth weight 2,4,5-T production.**

469  
470  
471  
472  
473

474  
475  
476  
477  
478  
479  
480  
481  
482  
483  
484  
485  
486  
487  
488  
489  
490  
491  
492  
493  
494  
495  
496

497 **Figure 1 - Figure 1. Kanawha County, West Virginia**

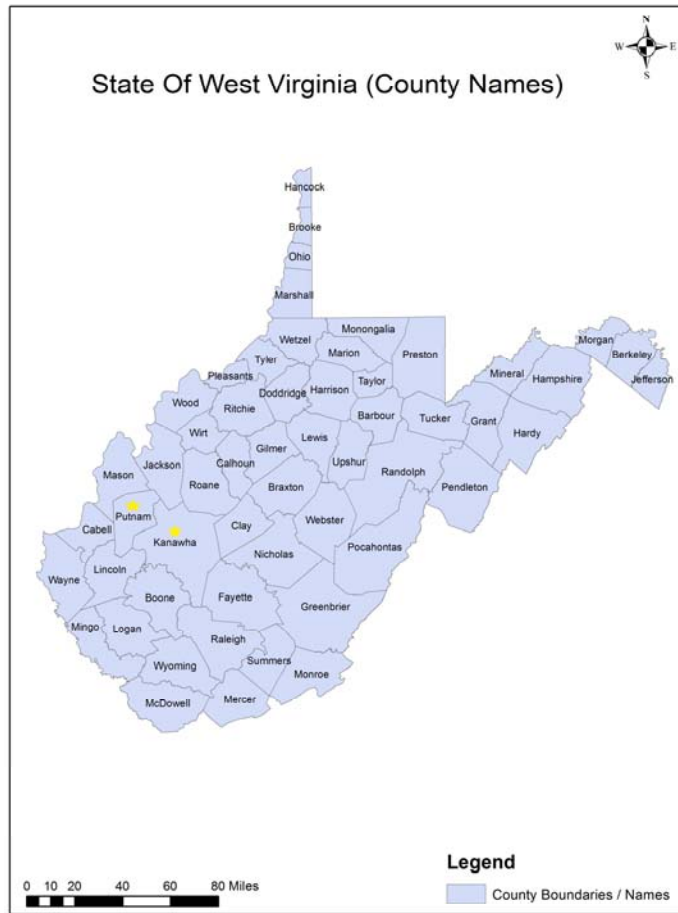

498  
499  
500  
501  
502  
503  
504  
505  
506  
507  
508  
509  
510  
511  
512  
513  
514  
515  
516  
517

Figure 2

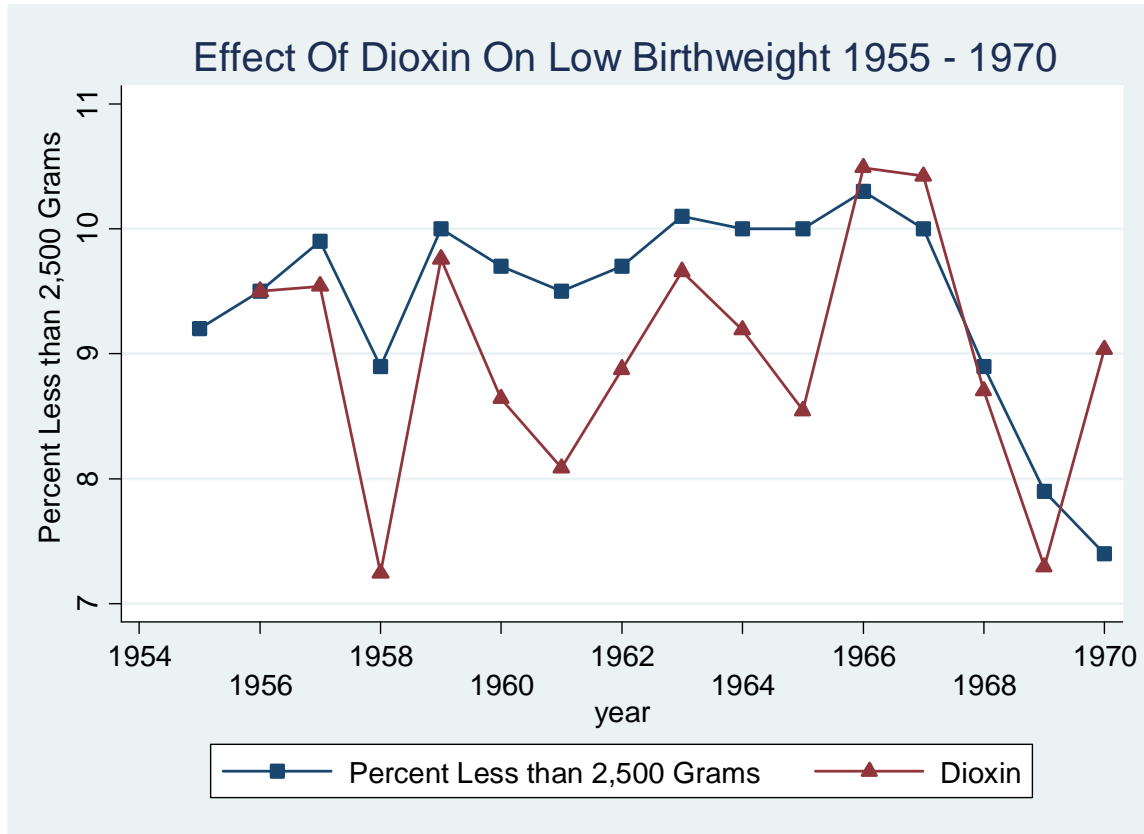

518  
519  
520  
521  
522  
523  
524  
525  
526  
527  
528  
529  
530  
531  
532  
533  
534  
535  
536  
537  
538  
539  
540  
541

Figure 3

542

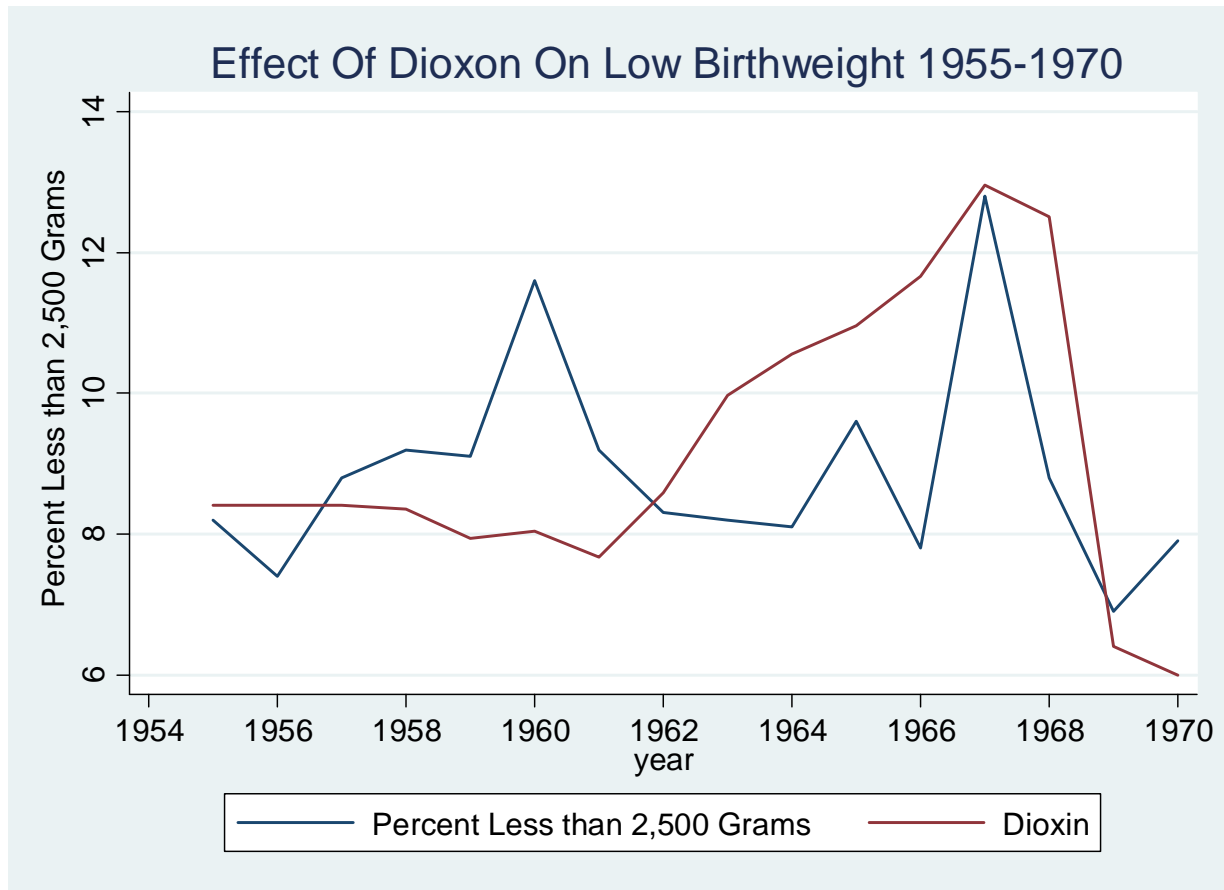

543

544

545

546

547

548

549

550

551

552

553

554

555

556

557 **Figure A1. Time series analysis of low birth weight 2,4,5-T production.**

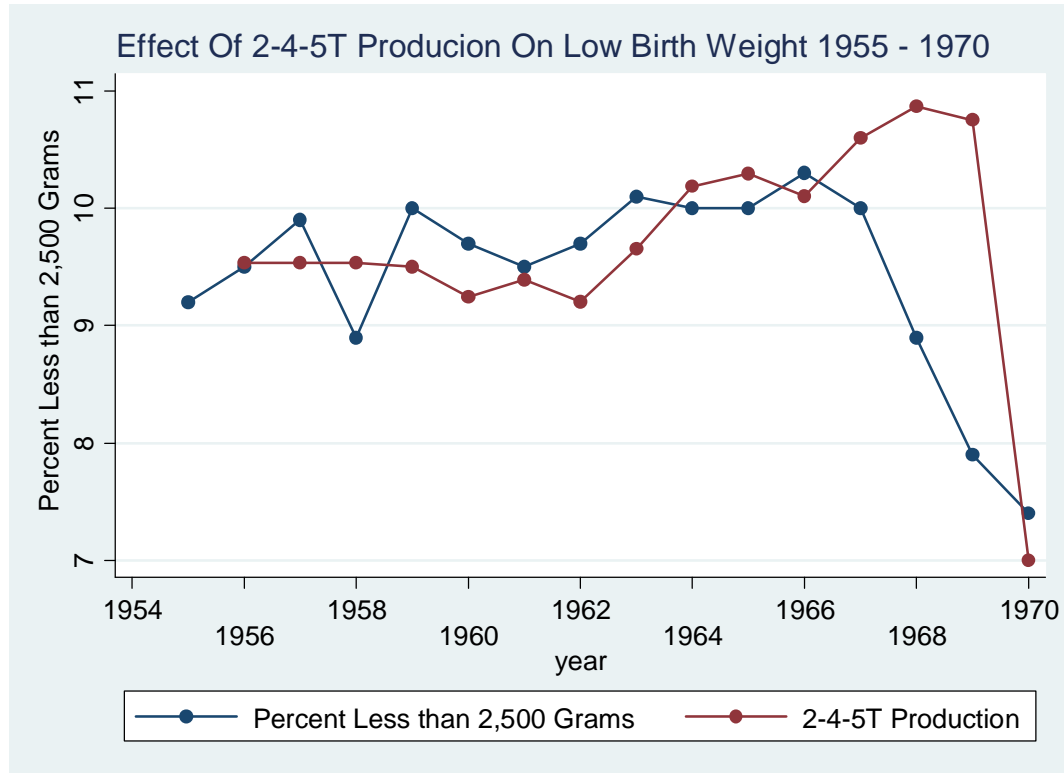

558  
559  
560  
561  
562  
563  
564  
565  
566
